# Supplementary material for: From ground pools to treeholes: convergent evolution of habitat and phenotype in Aedes mosquitoes
Source: PubMed Central journal article supplement (PMC5735545; doi:10.1186/s12862-017-1092-y), 2017-12-19
Supplement: 12862_2017_1092_MOESM3_ESM.pdf [file 12862_2017_1092_MOESM3_ESM.pdf]

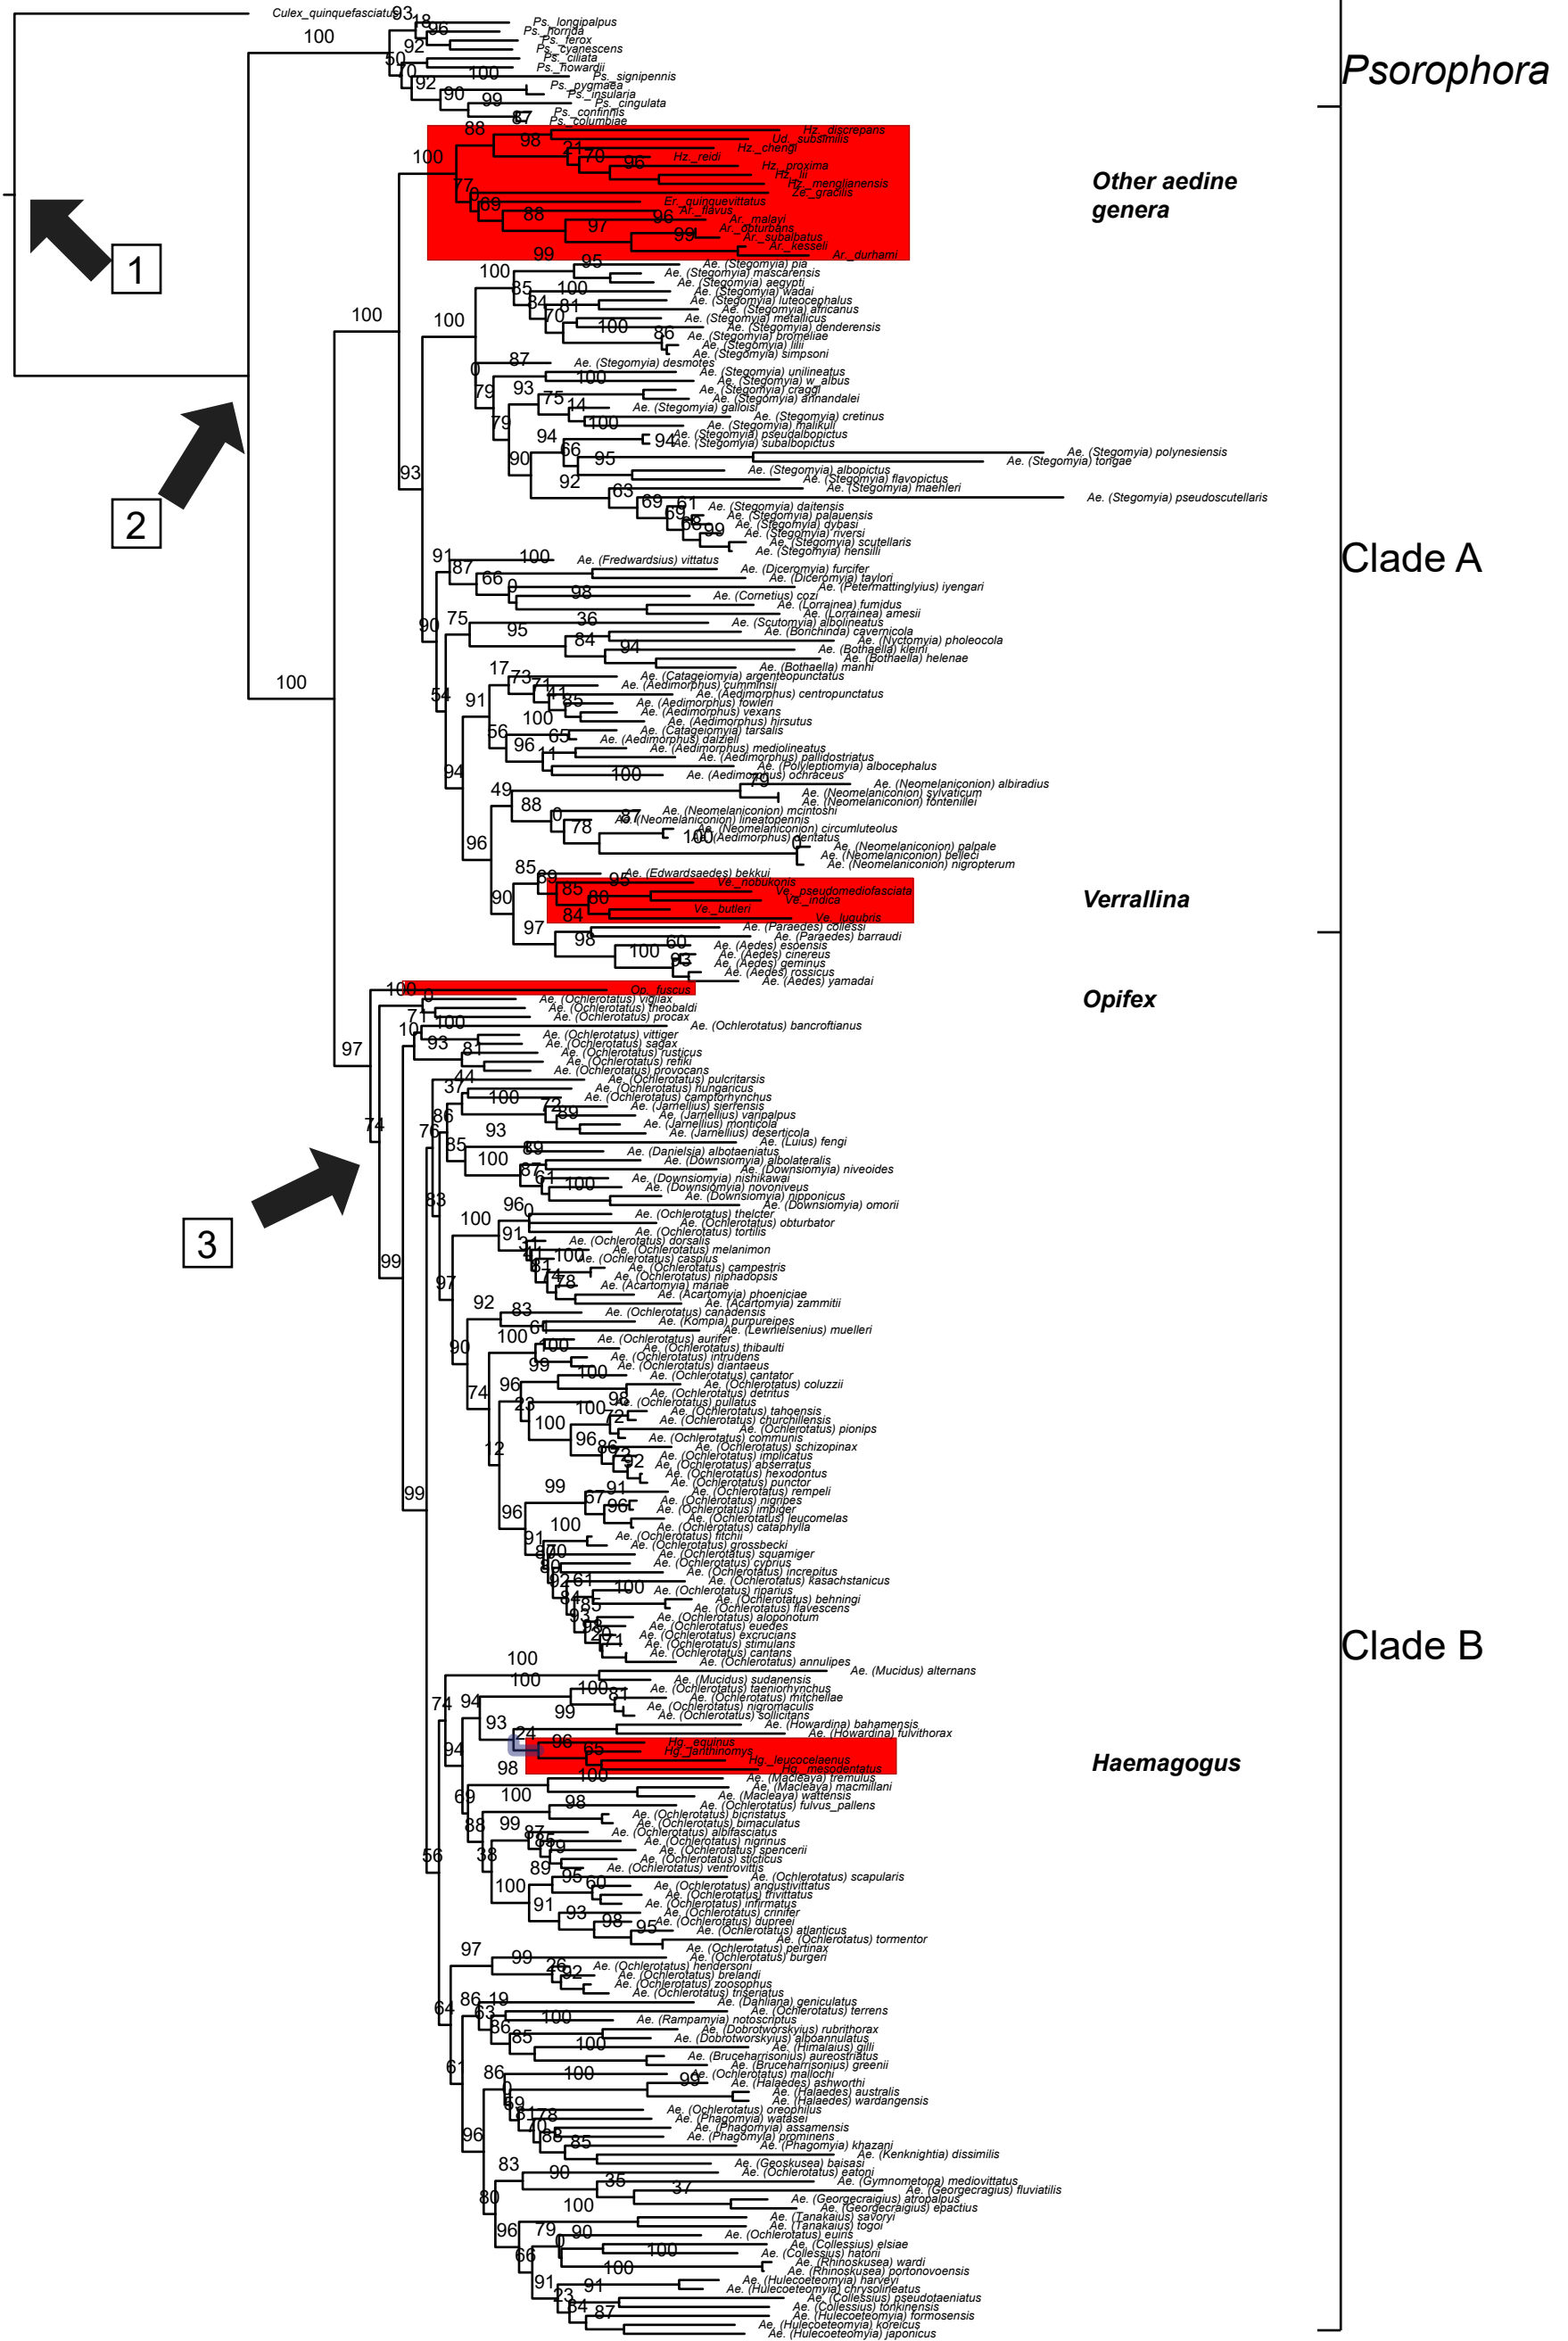

*Culex quinquefasciatus*

**Psorophora**

**Other aedine genera**

**Clade A**

**Verrallina**

**Opifex**

**Clade B**

**Haemagogus**

1

2

3

0.06
