# Supplementary material for: From ground pools to treeholes: convergent evolution of habitat and phenotype in Aedes mosquitoes
Source: PubMed Central journal article supplement (PMC5735545; doi:10.1186/s12862-017-1092-y), 2017-12-19
Supplement: 12862_2017_1092_MOESM6_ESM.pdf [file 12862_2017_1092_MOESM6_ESM.pdf]

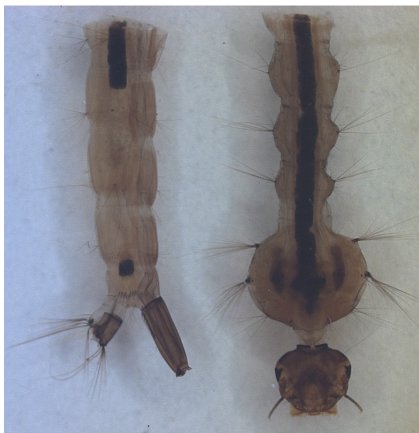

*Aedes (Ochlerotatus) triseriatus*

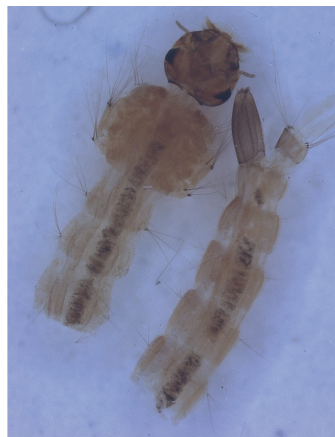

*Aedes (Stegomyia) albopictus*

### Container Dwelling Phenotypes

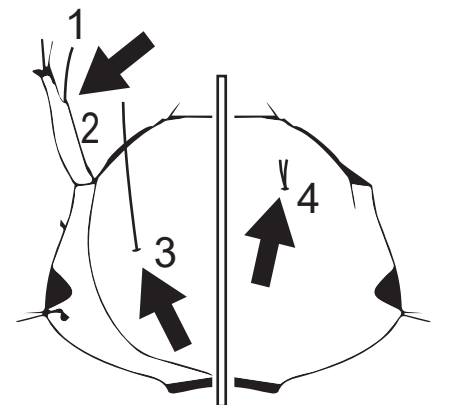

Dorsal

Ventral

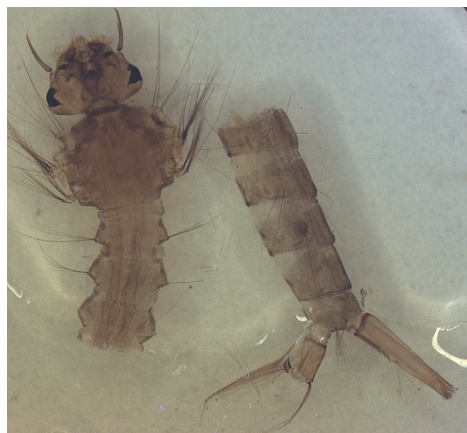

*Aedes (Ochlerotatus) excrucians*

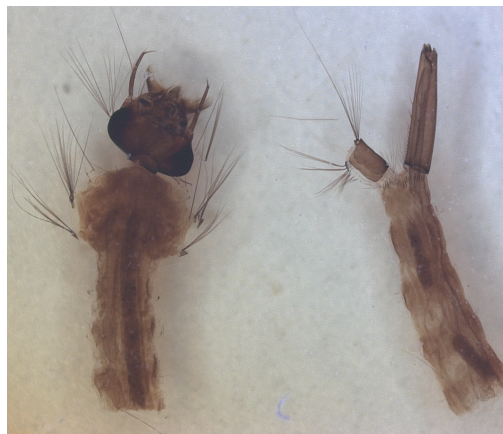

*Aedes (Aedes) cinereus*

### Ground Pool Dwelling Phenotypes

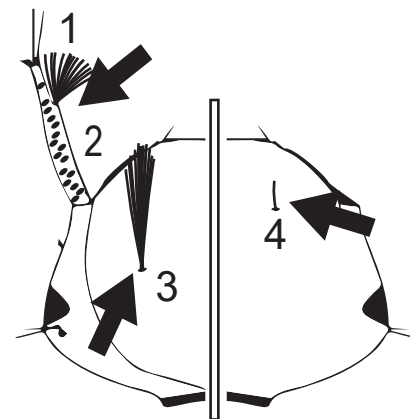

Dorsal

Ventral
