# Supplementary material for: From ground pools to treeholes: convergent evolution of habitat and phenotype in Aedes mosquitoes
Source: PubMed Central journal article supplement (PMC5735545; doi:10.1186/s12862-017-1092-y), 2017-12-19
Supplement: 12862_2017_1092_MOESM7_ESM.pdf [file 12862_2017_1092_MOESM7_ESM.pdf]

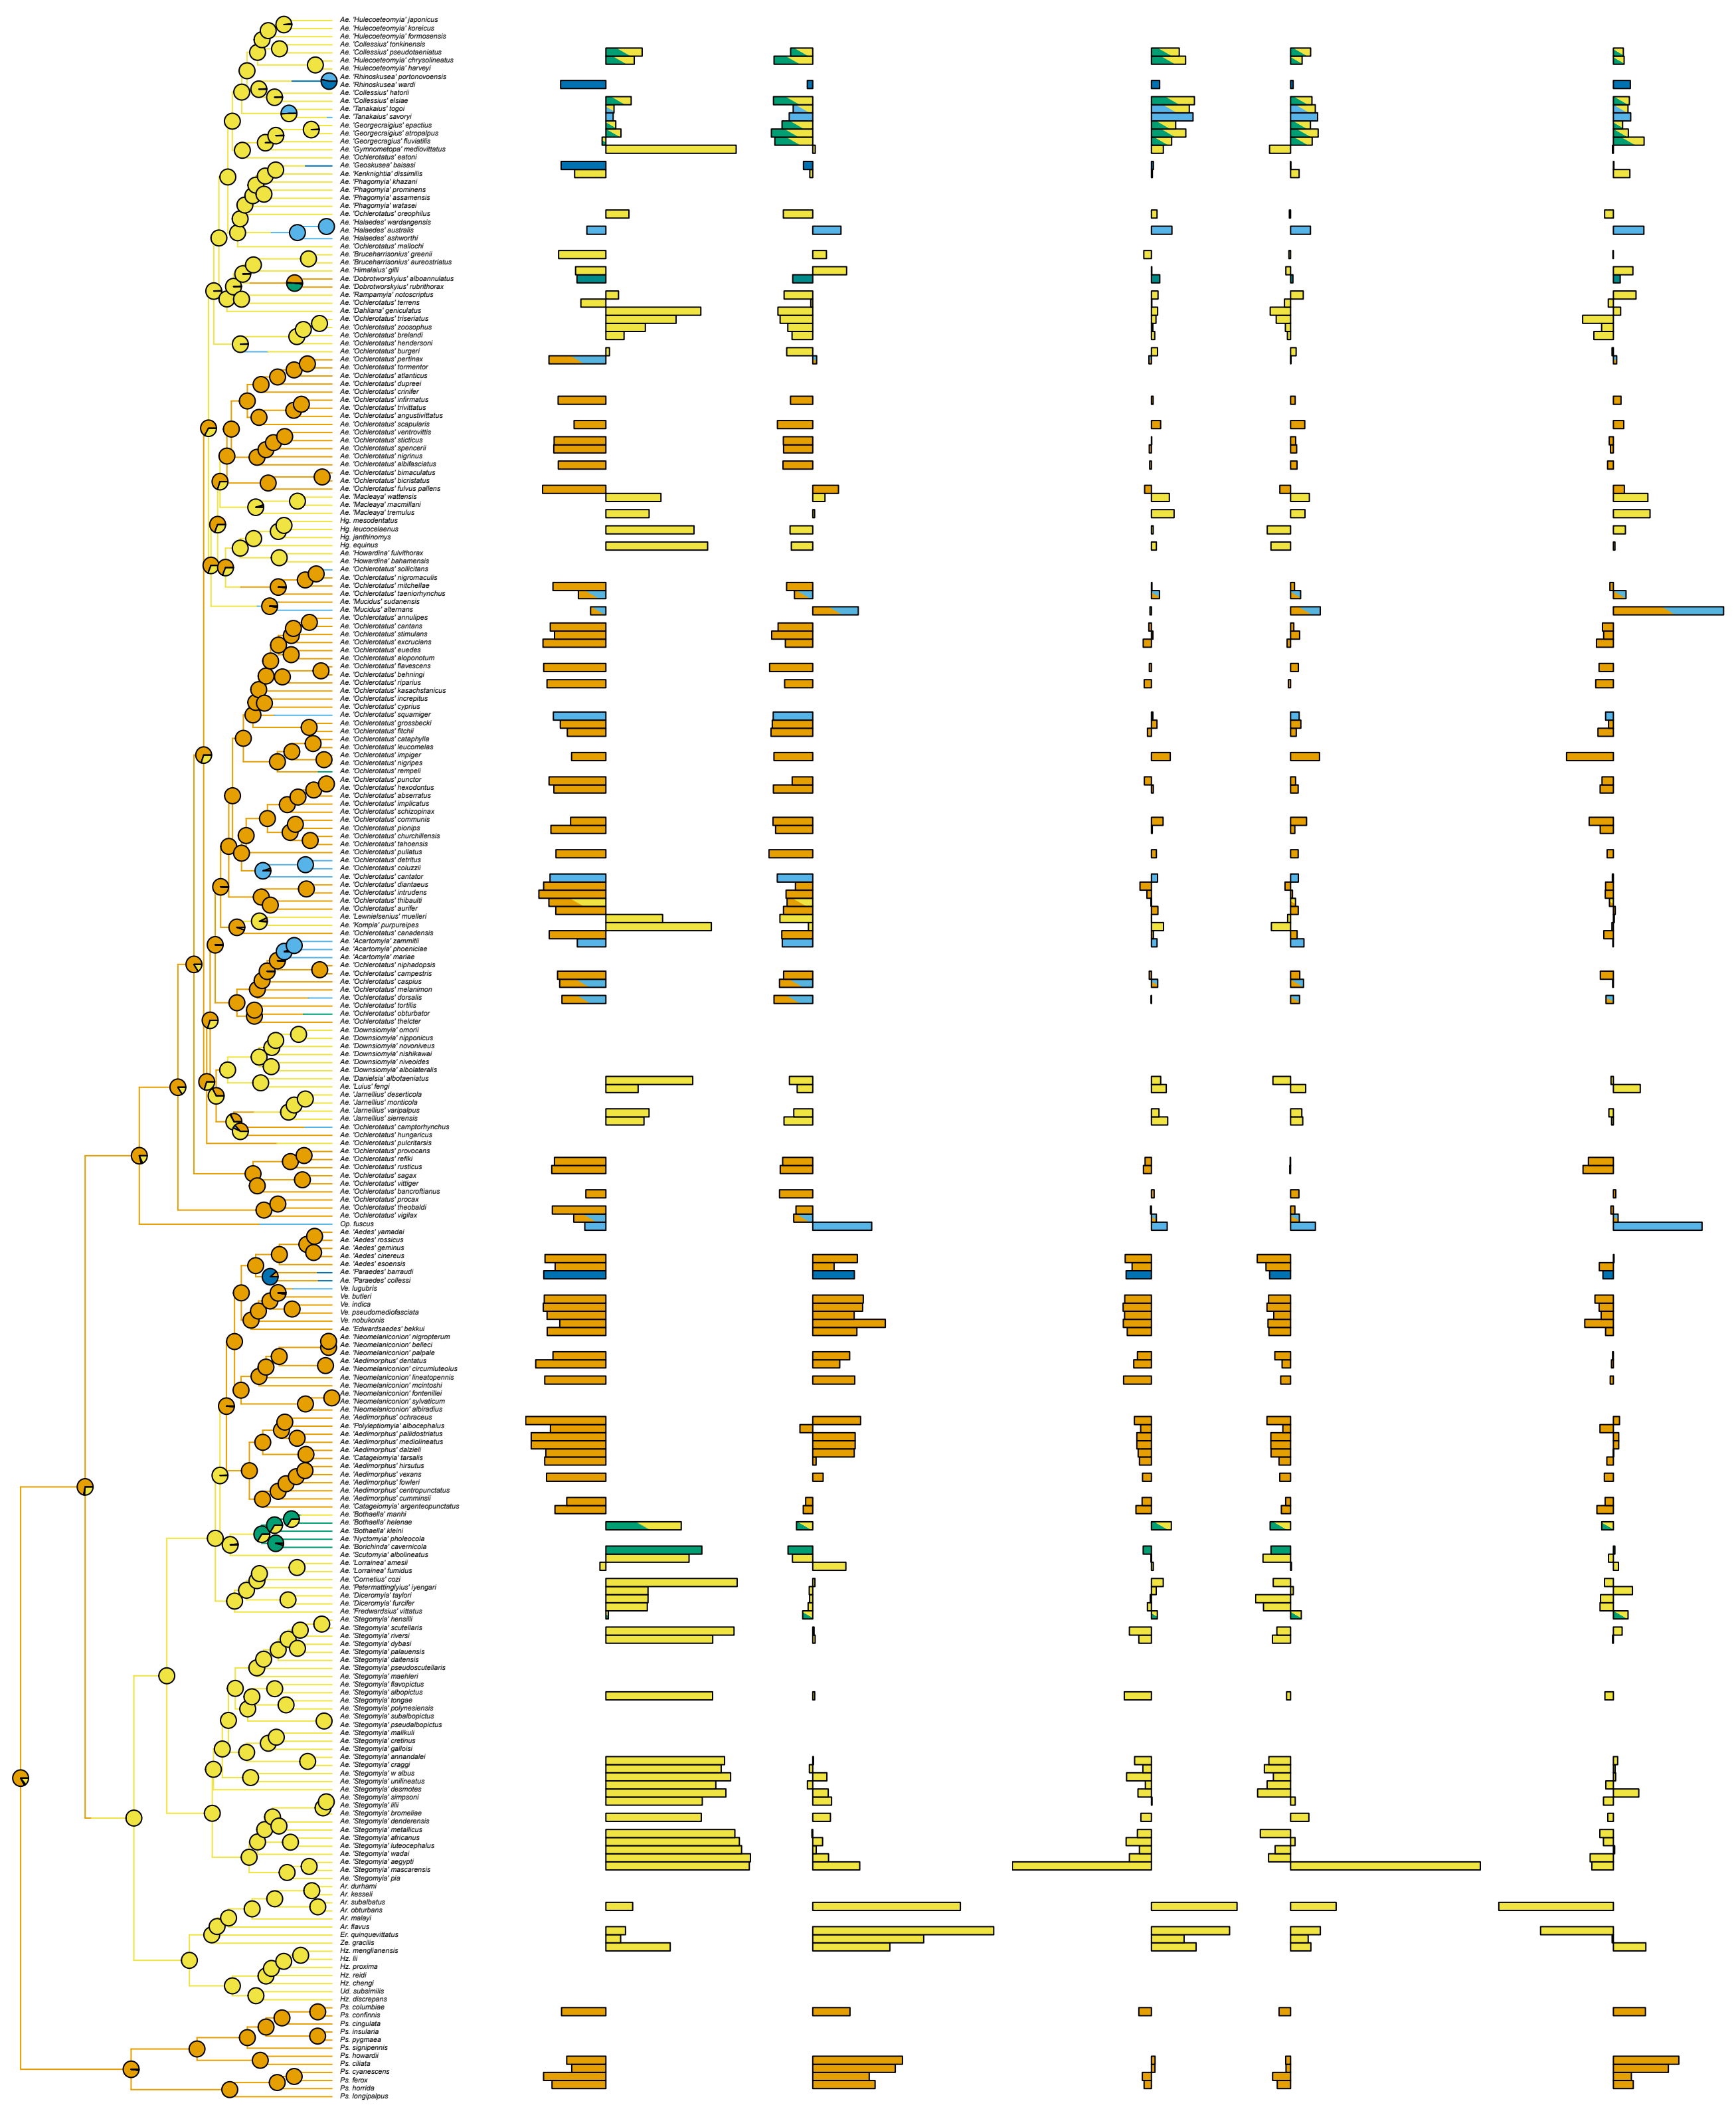

-0.5 0.0 0.5 1.0      0.0 0.5 1.0      -1.5 -1.0 -0.5 0.0 0.5 1.0      0.0 0.5 1.0 1.5 2.0      -1.0 -0.5 0.0 0.5 1.0

Dimension 1      Dimension 2      Dimension 3      Dimension 4      Dimension 5
