# Supplementary material for: From ground pools to treeholes: convergent evolution of habitat and phenotype in Aedes mosquitoes
Source: PubMed Central journal article supplement (PMC5735545; doi:10.1186/s12862-017-1092-y), 2017-12-19
Supplement: 12862_2017_1092_MOESM11_ESM.pdf [file 12862_2017_1092_MOESM11_ESM.pdf]

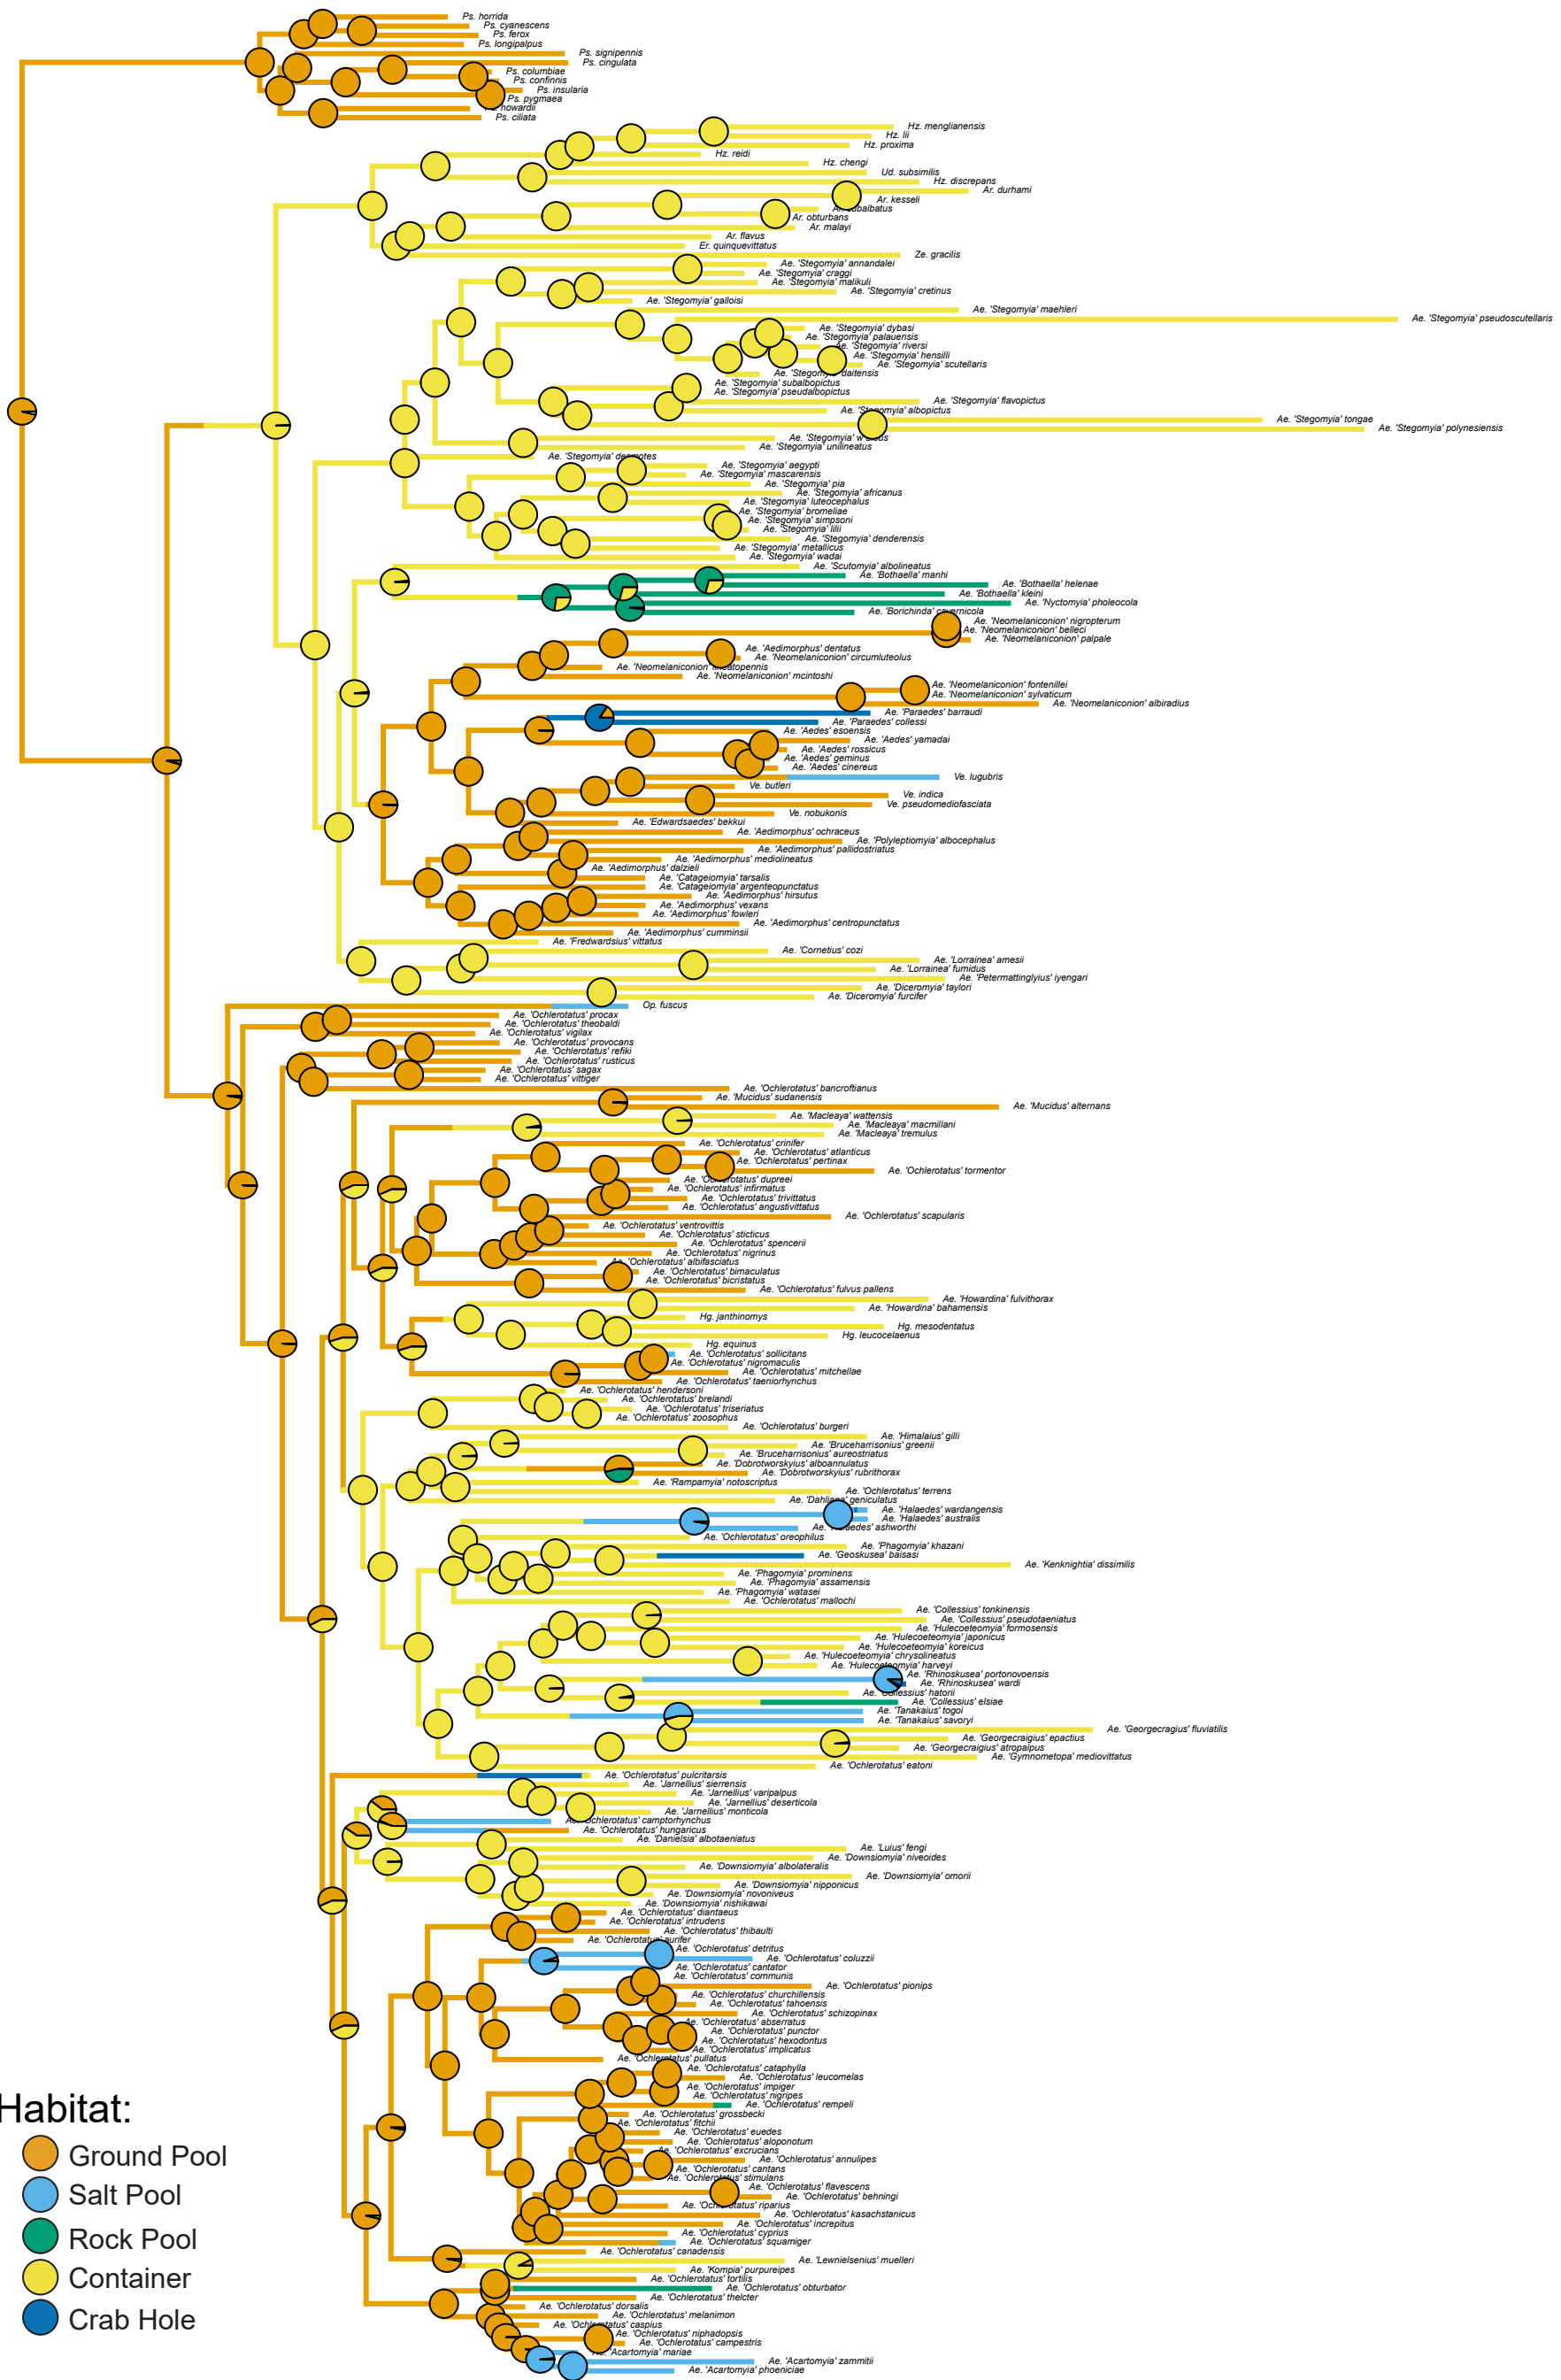

**Habitat:**

- Ground Pool
- Salt Pool
- Rock Pool
- Container
- Crab Hole
